# Supplementary material for: Establishing chronic condition concordance and discordance with diabetes: a Delphi study
Source: BMC Fam Pract. 2015 Mar 28;16:42. doi: 10.1186/s12875-015-0253-6 (PMC4391600; doi:10.1186/s12875-015-0253-6)
Supplement: Addditional file 1: — Screenshot of one page of the we -based Delphi survey. [file 12875_2015_253_MOESM1_ESM.pdf]

## ADDITIONAL FILE 1: DELPHI SURVEY SAMPLE

Please identify if, in your practice, the following care is indicated for a typical adult patient who has each specific chronic condition. Assume that the patient has only this chronic condition. Please click only where you would typically undertake the proposed care management strategy.

### Cardiac, vascular and pulmonary conditions

[illegible]
